# Supplementary material
Source: PubMed Central journal article supplement (PMC4303449)
Supplement: embr0015-0062-sd2.pdf [file embr0015-0062-sd2.pdf]

# Supplementary figure 2

## Short-term clonal expansion of K-ras<sup>G12D</sup> mutated Lgr5<sup>hi</sup> cells

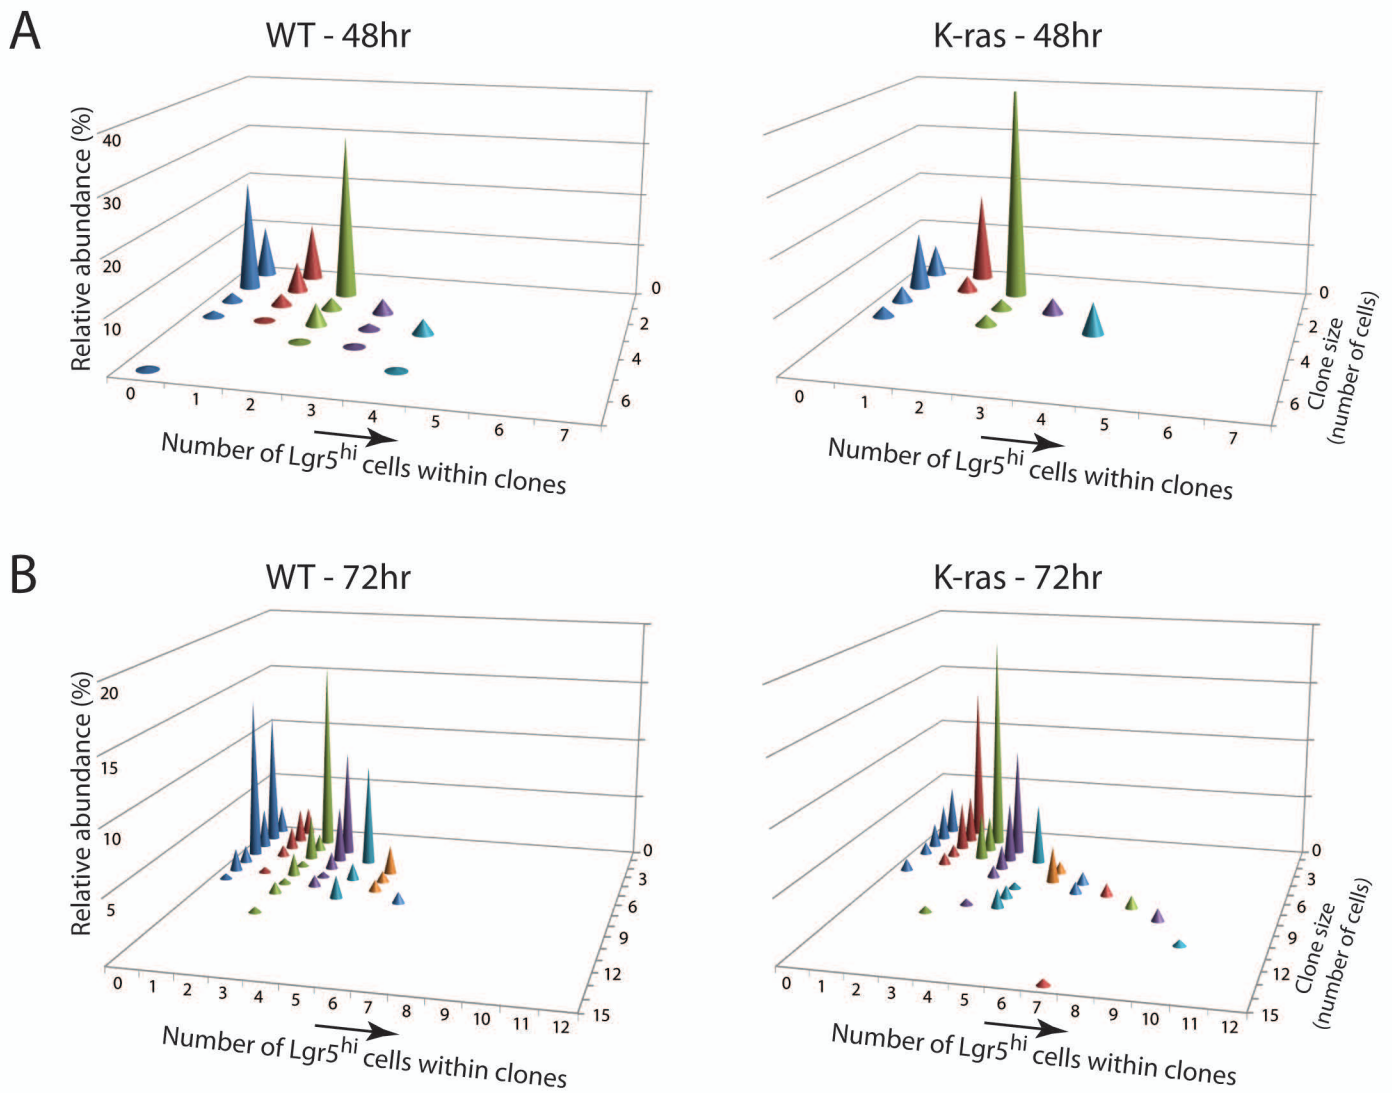

### Supplementary figure 2: Short-term clonal expansion of K-ras<sup>G12D</sup> mutated Lgr5<sup>hi</sup> cells

**A)** Representation of the relative abundance (%) of clones scored for total clone size and the number of Lgr5<sup>hi</sup> cells after 48hr. Total clone size was scored as the total number of cells within a given clone, while the stem cell content was determined as the number of Lgr5<sup>hi</sup> cells within that clone. Left: WT clones, right: K-ras<sup>G12D</sup> activated clones. **B)** Like A, but after 72hrs of tracing.
